# Supplementary material for: Additional Results from Two Randomized, Placebo-Controlled Trials of Stiripentol in Dravet Syndrome Highlight a Rapid Antiseizure Efficacy with Longer Seizure-Free Periods
Source: Springer Nature journal article supplement (doi:10.1007/s40120-024-00623-8), 2024-05-09
Supplement: MOESM1 [file 27072536]

## SUPPLEMENTARY MATERIAL

### ADDITIONAL RESULTS FROM TWO RANDOMIZED, PLACEBO-CONTROLLED TRIALS OF STIRIPENTOL IN DRAVET SYNDROME HIGHLIGHT A RAPID ANTISEIZURE EFFICACY WITH LONGER SEIZURE-FREE PERIODS

Renzo Guerrini<sup>\*,†</sup>, Laurent Chancharme<sup>‡</sup>, Benjamin Serraz<sup>§</sup>, Catherine Chiron<sup>¶,||</sup>

\* Neuroscience Department, Meyer Children's Hospital IRCCS, viale Pieraccini 24, Florence 50139, Italy

† University of Florence, Italy

‡ Biocodex R&D Center, 3 chemin d'Armancourt, 60200 Compiègne, France

§ Biocodex, 7 avenue Gallieni, 94250 Gentilly, France

¶ INSERM, NeuroDiderot, F-75019 Paris, France

|| Pediatric Neurology and French Reference Center for Rare Epilepsies (CRÉER), APHP, Necker-Enfants Malades Hospital, F-75015 Paris, France

Original research article

Corresponding author: Pr Renzo Guerrini

e-mail: [renzo.guerrini@meyer.it](mailto:renzo.guerrini@meyer.it)

tel: +390555662573

Additional information on individual treatment response, study design and ethical consideration in the STICLO studies.

**Figure S1** - Overall study design

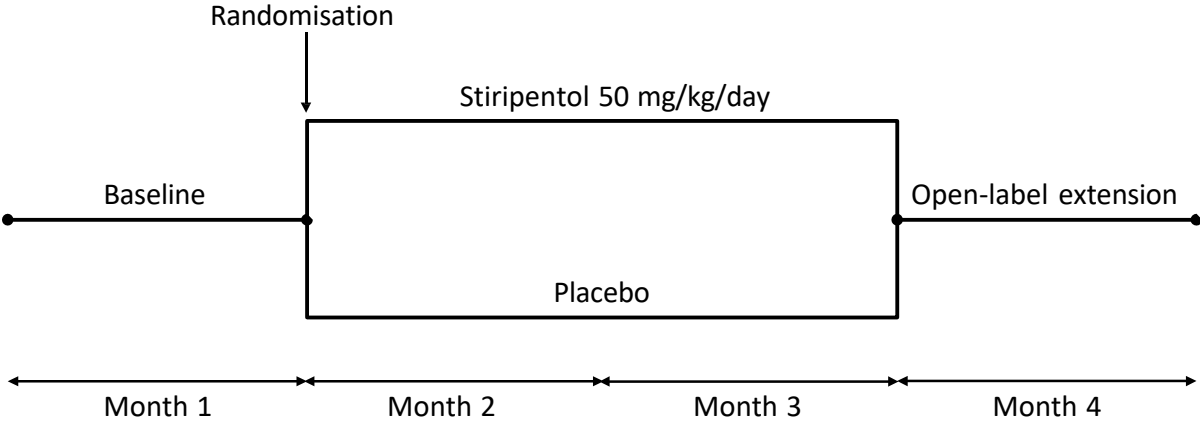

**Figure S2 – Individual Change in the number of seizures from baseline**

Change in seizure frequency is represented by a waterfall chart where patients are ordered by the magnitude of the change between baseline and 1<sup>st</sup> month under treatment or 2<sup>nd</sup> month under treatment or open-label period. All frequencies are adjusted for a 30-day period to be comparable.

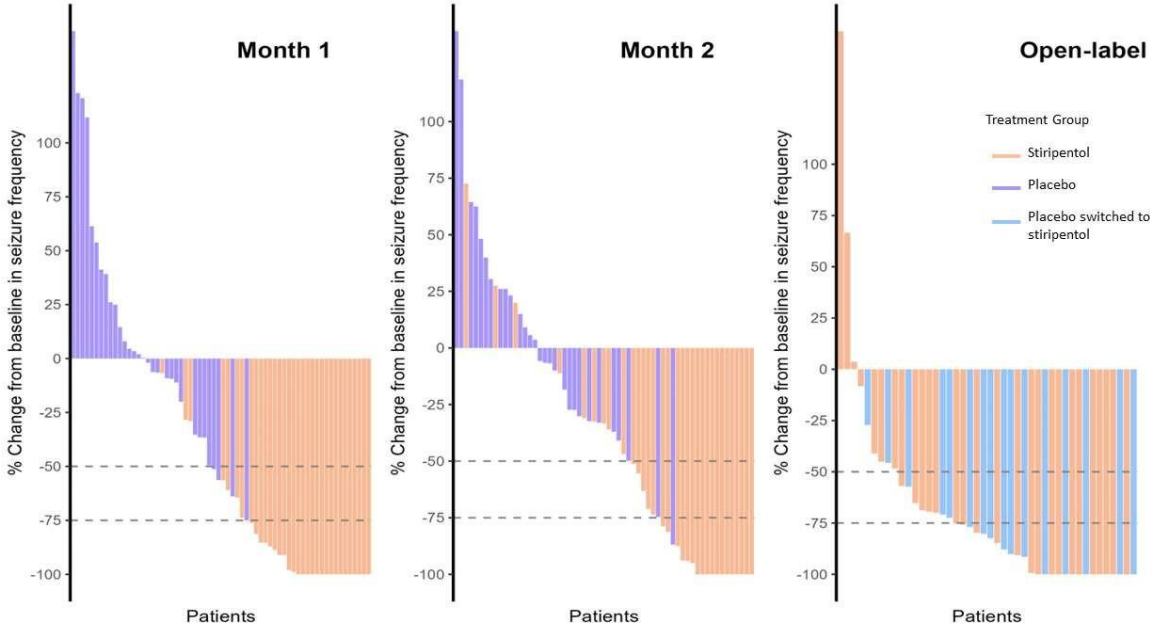

Figure S3 - Individual treatment response over time

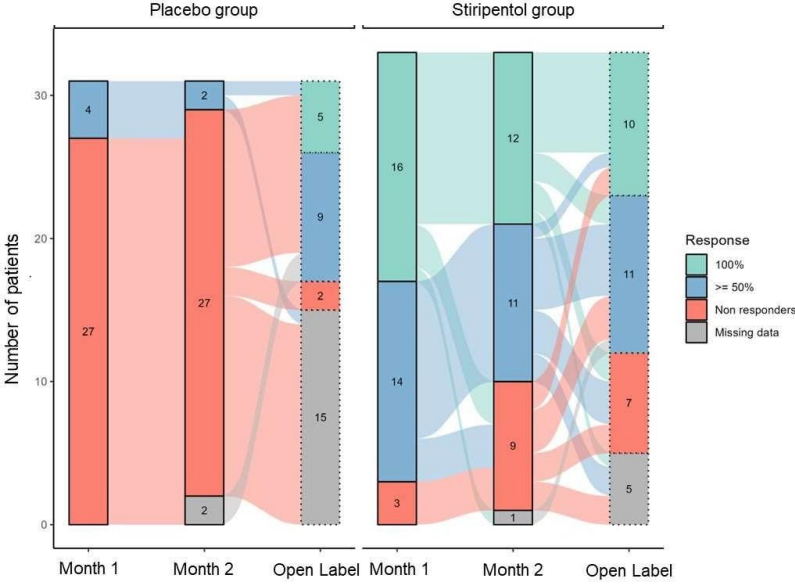

**Table S1 - List of Italian Ethics Committees**

**Principal investigator**

Dr Renzo GUERRINI  
Istituto di Neuropsichiatria Infantile  
Università di Pisa – IRCCS Stella Maris  
Via dei Giacinti, 2  
56018 CALAMBRONE (PISA), Italy

**Ethics Committee**

IRCCS Stella Maris Comitato Etico

**Investigators**

Dr Anna Rita FERRARI  
Istituto di Neuropsichiatria Infantile  
Università di Pisa – IRCCS Stella Maris  
Via dei Giacinti, 2  
56018 CALAMBRONE (PISA), Italy

IRCCS Stella Maris Comitato Etico

Prof. Bernardo Dalla BERNARDINA and Dr  
Francesca DARRA  
Cattedra di Neuropsichiatria Infantile  
Policlinico GB Rossi – Borgo Roma  
VERONA, Italy

Azienda Ospedaliera  
Istituti Ospitalieri di Verona  
Commissione Tecnica per la Sperimentazione  
Clinica

Prof. Giovanni LANZI and Dr Pierangelo  
VEGGIOTTI  
Divisione di Neuropediatria Infantile  
Fondazione Casimiro Mondino  
27100 PAVIA, Italy

Fundazione Istituto Neurologico Casimiro  
Mondino  
Comitato Etico

Pr Antonio PASCOTTO and Dr Giangennaro  
COPPOLA  
Cattedra di Neuropsichiatria Infantile  
I1 Ateneo  
Via Sergio Pansini, 5  
80131 NAPOLI, Italy

Seconda Università degli Studi di Napoli  
Comitato Etico della Facoltà di Medicina e  
Chirurgia

Dr Federico VIGEVANO  
Divisione di Neurologia Infantile  
Ospedale del Bambino Gesù  
Piazza Sant'Onofrio, 4  
00165 ROMA, Italy

IRCCS Ospedale Pediatrico Bambino Gesù

Prof.ssa Edvige VENESELLI and Dr Roberto  
GAGGERO  
Unità Operativa e Cattedra di Neuropsichiatria  
Infantile  
Istituto G. Gaslini  
Largo Gaslini  
16148 GENOVA, Italy

Istituto Giannina Gaslini  
Comitato di Etica per la Ricerca Scientifica e  
Biomedica e per la Sperimentazione Clinica
